# Supplementary material for: Ellagic acid ameliorates alcohol-induced cognitive and social dysfunction through the gut microbiota-mediated CCL21-CCR7 axis
Source: Royal Society of Chemistry journal article supplement (doi:10.1039/d4fo03985h), 2024-01-01
Supplement: d4fo03985h1.pdf [file d4fo03985h1.pdf]

## Supporting Information

### Ellagic acid ameliorates alcohol-induced cognitive and social dysfunction through the gut microbiota-mediated CCL21-CCR7 axis

Hongbo Zhang<sup>a</sup>, Min Luo<sup>a</sup>, YINUO Li<sup>a</sup>, Lu Liu<sup>a</sup>, Ji Bian<sup>b</sup>, Lan Gong<sup>c</sup>,  
Caian He<sup>a\*\*\*</sup>, Lin Han<sup>a\*\*</sup>, Min Wang<sup>a\*</sup>

<sup>a</sup> Department of Nutrition and Health, College of Food Science and Engineering, Northwest A&F University, Yang ling 712100, Shaanxi, China

<sup>b</sup> Kolling Institute, Sydney Medical School, Royal North Shore Hospital, University of Sydney, St. Leonards, NSW 2065, Australia

<sup>c</sup> UNSW Microbiome Research Centre, St George and Sutherland Clinical Campus, University of New South Wales, Sydney, NSW 2052, Australia

**\*Corresponding author:**

\*Email: wangmin20050606@163.com (Min Wang)

\*\*Email: hanlin730@163.com (Lin Han)

\*\*\*Email: caian.he@nwafu.edu.cn (Caian He)

**Table S1 Key resources in the current study**

| <b>Reagent or resource</b>                                                   | <b>Source</b>                                | <b>Identifier</b>                   |
|------------------------------------------------------------------------------|----------------------------------------------|-------------------------------------|
| <b>Antibodies</b>                                                            |                                              |                                     |
| IBA-1                                                                        | Abcam                                        | Cat# ab178847;<br>RRID:AB_2832244   |
| CCL21                                                                        | Thermo Fisher                                | Cat# 500-P114BT;<br>RRID:AB_2929279 |
| Goat anti-Mouse IgG<br>(H+L)<br>Cross-Adsorbed<br>Secondary<br>Antibody, HRP | Thermo Fisher<br>Scientific                  | Cat# a16078;<br>RRID:AB_2534752     |
| <b>Chemicals</b>                                                             |                                              |                                     |
| Ellagic acid                                                                 | Nanjing DASF<br>Biotechnology                | CAS NO 476-66-4                     |
| Metronidazole                                                                | Dalian Meilun<br>biological Technology<br>Co | CAS NO 443-48-1                     |
| Ampicillin                                                                   | Dalian Meilun<br>biological Technology<br>Co | CAS NO 7177-48-2                    |

|                                |                                        |                                                                     |
|--------------------------------|----------------------------------------|---------------------------------------------------------------------|
| Vancomycin hydrochloride       | Dalian Meilun biological Technology Co | CAS NO 1404-93-9                                                    |
| Neomycin Sulfate               | Dalian Meilun biological Technology Co | CAS NO 1405-10-3                                                    |
| Hematoxylin                    | Poly-scientific                        | S212                                                                |
| Eosin                          | StatLab                                | SL98-1                                                              |
| TB Green™ Premix Ex Taq™ II    | TaKaRa                                 | RR820Q                                                              |
| Sterile ethanol liquid diet    | TROPHIC Animal Feed High-tech Co.      | AIN-93M                                                             |
| <b>Software and Algorithms</b> |                                        |                                                                     |
| ImageJ v2.3.0                  | National Institutes of Health          | RRID:SCR_003070                                                     |
| Super Maze                     | XR-Xmaze                               | <a href="http://www.softmaze.com/">http://www.softmaze.com/</a>     |
| R (v4.2.1)                     | R Team                                 | <a href="https://www.r-project.org/">https://www.r-project.org/</a> |

**Table S2 Primer sequences for qRT-PCR**

| <b>Gene</b>        | <b>Forward Primer</b> | <b>Reverse Primer</b> |
|--------------------|-----------------------|-----------------------|
| <b><i>Tnfa</i></b> | CTCATGCACCACCATCAAGG  | ACCTGACCACTCTCCCTTTG  |

---

|                        |                      |                      |
|------------------------|----------------------|----------------------|
| <b><i>Ii6</i></b>      | CCTCTGGTCTTCTGGAGTAC | ACTCCTTCTGTGACTCCAGC |
|                        | C                    |                      |
| <b><i>Ii10</i></b>     | ATAACTGCACCCACTTCCCA | GGGCATCACTTCTACCAGGT |
| <b><i>Iba1</i></b>     | TGACGGACCCCAAAGATGA  | TCTCCACAGCCACAATGAGT |
| <b><i>Ccl21a</i></b>   | ATCCCGGCAATCCTGTTCTC | CCCTTGGAGCCCTTTCCTTT |
| <b><i>Ccl21b</i></b>   | CTGGTGGTAACGAGGCTCA  | AATGGTGTCCCAGTTGCCTC |
| <b><i>Ccl21c</i></b>   | GTGGTAACGAGGCTCAC    | CCAGCCTAAGATCCTGCCTT |
| <b><i>Ccl21d</i></b>   | CATCCCGGCAATCCTGTTCT | TTCTCTTGCAGCCCTTGGAG |
| <b><i>Tnfrsf17</i></b> | CAGCTTGACGGATCGGCT   | CCCCTTGGGTTTGCTCTTGA |
| <b><i>Total</i></b>    | ACTCCTACGGGAGGCAGCA  | GGACTACHVGGGTWTCTAA  |
| <b><i>bacteria</i></b> | G                    | T                    |
|                        |                      | AGAGAGCTTGATGGCTTGG  |
| <b><i>Bace2</i></b>    | AGTAACTTCGCTGTGGCAGG | C                    |
|                        | AGAGCGGGAATGGTGAAGA  | AGTTGATCTGTCTCCGCTTG |
| <b><i>Fos</i></b>      | C                    | G                    |
| <b><i>Npas4</i></b>    |                      |                      |
| <b><i>Rab3a</i></b>    | TTTGCAGGACGTCAGCTAGG | CTGTGGCGGAAGCCATCTTA |

---

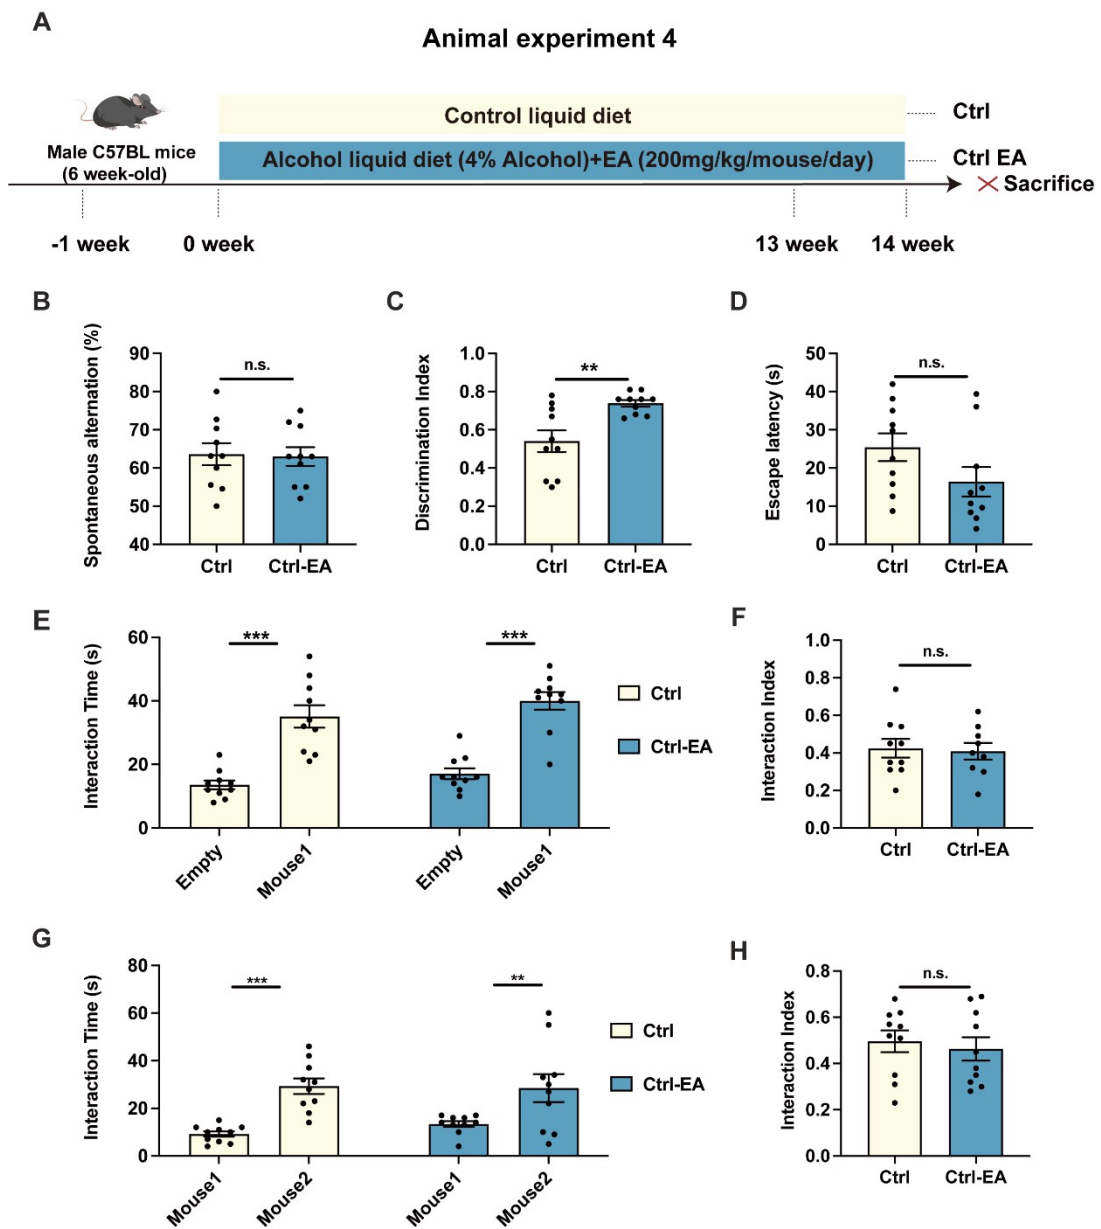

**Fig. S1. Effects of UA on cognitive and social functions in non-alcohol diet mice.**

**(A)** Timeline of animal experiment 4 depicting the non-alcohol diet with EA treatment.

**(B)** For the Y-maze, spontaneous alternations were recorded. E

**(C)** For the Barnes maze, escape latency was recorded.

**(D)** The discrimination index between the novel and familiar objects was calculated for the novel object recognition test.

**(E)** In the sociability test, the interaction index was calculated.

**(F)** The sociability test recorded the time spent interacting with a mouse or an empty wire cage.

**(G)** In the social novelty test, the interaction index was calculated.

**(H)** In the social novelty test, the time spent interacting with a novel versus a familiar mouse was recorded.

Data presented as mean  $\pm$  SEM. \* $p < 0.05$ , \*\* $p < 0.01$ , \*\*\* $p < 0.001$ , compared with Alc group. Significant differences between mean values were determined by one-way ANOVA with Tukey's multiple comparisons test.

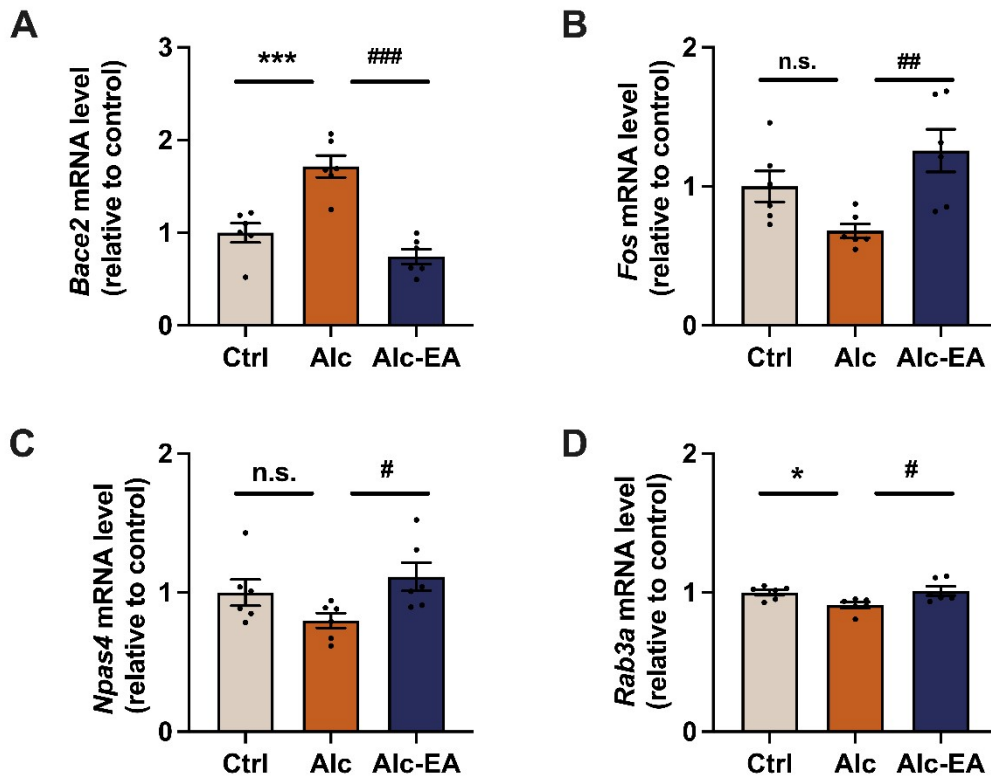

**Fig. S2. The mRNA expression levels of cognitive-related genes were analyzed based on RNA sequencing data from the hippocampus of mice.**

**(A)** The mRNA expression level of the *Bace2* gene in the hippocampus.

**(B)** The mRNA expression level of the *Fos* gene in the hippocampus.

**(C)** The mRNA expression level of the *Npas4* gene in the hippocampus.

**(D)** The mRNA expression level of the *Rab3a* gene in the hippocampus.

Data presented as mean  $\pm$  SEM. \* $p < 0.05$ , \*\* $p < 0.01$ , \*\*\* $p < 0.001$ , compared with Ctrl group, # $p < 0.05$ , ## $p < 0.01$ , ### $p < 0.001$ , compared with the Alc group.

Significant differences between mean values were determined by one-way ANOVA with Tukey's multiple comparisons test.

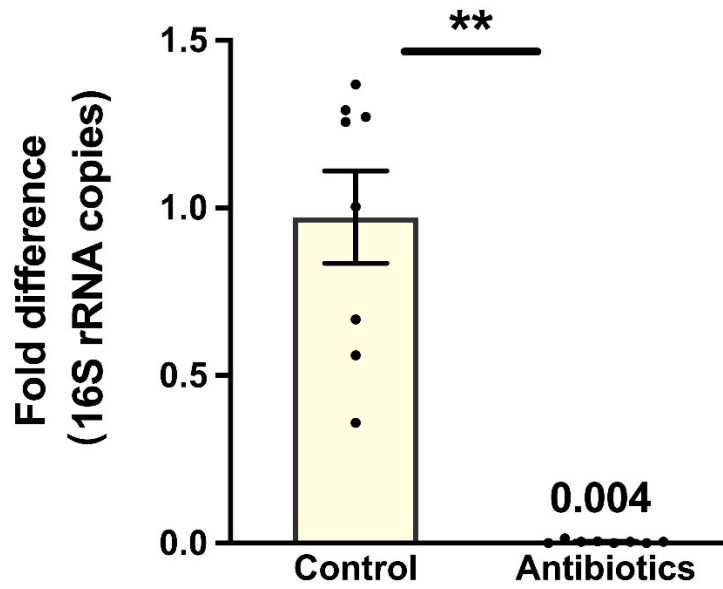

**Fig. S3. Removing gut microbiome effect diagram.**

Data were represented as mean  $\pm$  SEM ( $n \geq 8$ ); \*means compared to the “Control” group, \* $P < 0.05$ , \*\* $P < 0.01$
